# Supplementary material for: Assessment of climate change impact and difference on the riverrunoff in four basins in China under 1.5 °C and 2.0 °C globalwarming
Source: Copernicus journal article supplement (doi:10.5194/hess-2018-448), 2018-09-27
Supplement: Supplementary file [file hess-2018-448-AC1-supplement.pdf]

**Table S1. The differences in annual mean temperature and precipitation based on WFD and meteorological observations during 1961-2001.**

| River   | Annual precipitation |          |                | Annual mean temperature |         |                 |
|---------|----------------------|----------|----------------|-------------------------|---------|-----------------|
|         | OBS(mm)              | WFD (mm) | Difference (%) | OBS(°C)                 | WFD(°C) | Difference (°C) |
| Shiyang | 246.1                | 282.1    | 14.6           | 5.2                     | 2.7     | -2.5            |
| Chaobai | 570.7                | 476.5    | -20.0          | 9.2                     | 5.1     | -4.1            |
| Huaihe  | 917.6                | 898.7    | -2.1           | 14.9                    | 14.8    | -0.1            |
| Fujiang | 906.0                | 894.6    | -1.3           | 16.5                    | 15.6    | -0.9            |

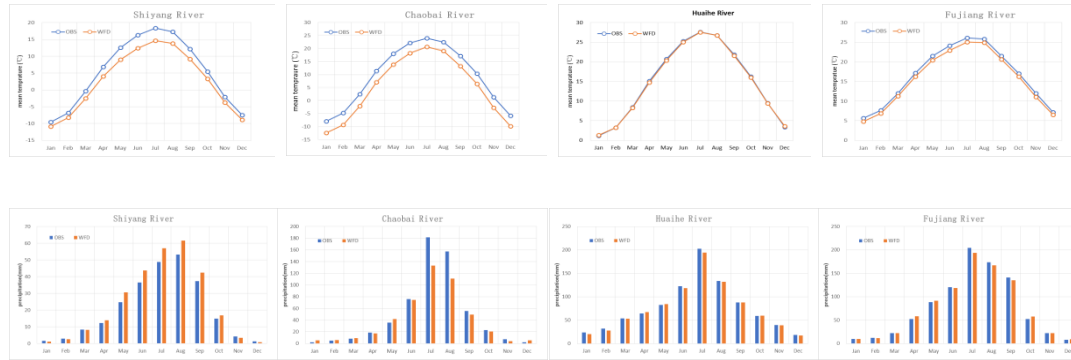

**Figure S1. The differences in monthly mean temperature and monthly precipitation based on WFD and meteorological observations during 1961-2001.**

**Table S2. The agreements in annual mean, maximum and minimum temperature, and mean annual precipitation based on WFD and downscaling climate data from five GCMs for during 1961-2001 for the four river basins.**

| River                                              | GFDL-ES<br>M2M                             | HadGEM2-<br>ES | IPSL-CM<br>5A-LR | MIROC-ES<br>M-CHEM | NorESM1-M |
|----------------------------------------------------|--------------------------------------------|----------------|------------------|--------------------|-----------|
|                                                    | Difference in mean annual temperature (°C) |                |                  |                    |           |
| Shiyang                                            | -0.01                                      | -0.03          | 0.02             | -0.00              | -0.03     |
| Chaobai                                            | -0.01                                      | -0.02          | 0.08             | -0.03              | -0.01     |
| Huaihe                                             | -0.01                                      | 0.01           | 0.07             | -0.03              | -0.05     |
| Fujiang                                            | 0.31                                       | 0.31           | 0.36             | 0.33               | 0.29      |
| Difference in mean annual maximum temperature (°C) |                                            |                |                  |                    |           |
| Shiyang                                            | 0.00                                       | 0.07           | 0.04             | 0.02               | 0.04      |
| Chaobai                                            | 0.02                                       | 0.10           | -0.02            | 0.00               | 0.02      |
| Huaihe                                             | 0.07                                       | 0.13           | 0.03             | 0.01               | 0.06      |
| Fujiang                                            | 0.24                                       | 0.29           | 0.25             | 0.23               | 0.27      |
| Difference in mean annual minimum temperature (°C) |                                            |                |                  |                    |           |
| Shiyang                                            | -0.01                                      | 0.03           | 0.01             | -0.01              | 0.01      |
| Chaobai                                            | -0.03                                      | 0.08           | -0.02            | -0.01              | 0.00      |
| Huaihe                                             | 0.00                                       | 0.05           | -0.05            | -0.07              | -0.04     |
| Fujiang                                            | 0.37                                       | 0.41           | 0.39             | 0.34               | 0.35      |
| Difference in mean annual precipitation (%)        |                                            |                |                  |                    |           |
| Shiyang                                            | 14.8                                       | 7.8            | 13.3             | 6.3                | 5.2       |

|         |      |     |     |      |     |
|---------|------|-----|-----|------|-----|
| Chaobai | 9.7  | 8.2 | 9.1 | 8.0  | 6.3 |
| Huaihe  | 4.9  | 5.4 | 5.3 | 3.9  | 4.8 |
| Fujiang | 11.0 | 5.6 | 8.7 | 10.4 | 7.2 |

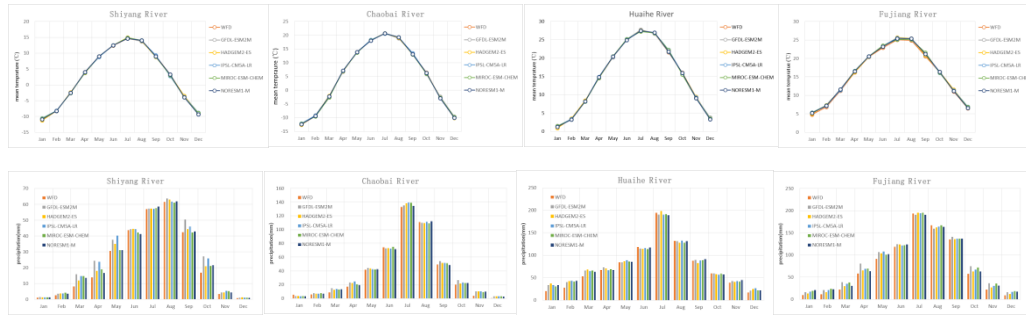

**Figure S2.** The agreements in monthly mean temperature and mean precipitation based on WFD and downscaling climate data from five GCMs for during 1961-2001 for the four river basins.

**Table S6.** The agreements in mean annual runoff and evapotranspiration based on WFD and downscaling climate simulation from 5 GCMs for during 1961-2001 for the four river basins.

| River   | GFDL-ES                                          | HadGEM2- | IPSL-CM | MIROC-ES | NorESM1-M |
|---------|--------------------------------------------------|----------|---------|----------|-----------|
|         | M2M                                              | ES       | 5A-LR   | M-CHEM   |           |
|         | Difference in mean annual runoff (%)             |          |         |          |           |
| Shiyang | 16.2                                             | 25.3     | 16.6    | 14.4     | 12.7      |
| Chaobai | -19.3                                            | 21.5     | 0.5     | -9.1     | -2.3      |
| Huaihe  | -7.2                                             | 23.7     | 9.3     | 6.3      | 3.8       |
| Fujiang | -6.2                                             | -16.7    | 6.3     | 0.0      | -4.3      |
|         | Difference in mean annual evapotranspiration (%) |          |         |          |           |
| Shiyang | -3.3                                             | -37.7    | -4.7    | -19.8    | -17.6     |
| Chaobai | 12.4                                             | -0.5     | 6.6     | 7.5      | 3.2       |
| Huaihe  | -1.8                                             | -8.1     | 0.8     | 3.2      | 4.8       |
| Fujiang | 15.5                                             | 13.4     | 4.7     | 11.7     | 12.7      |

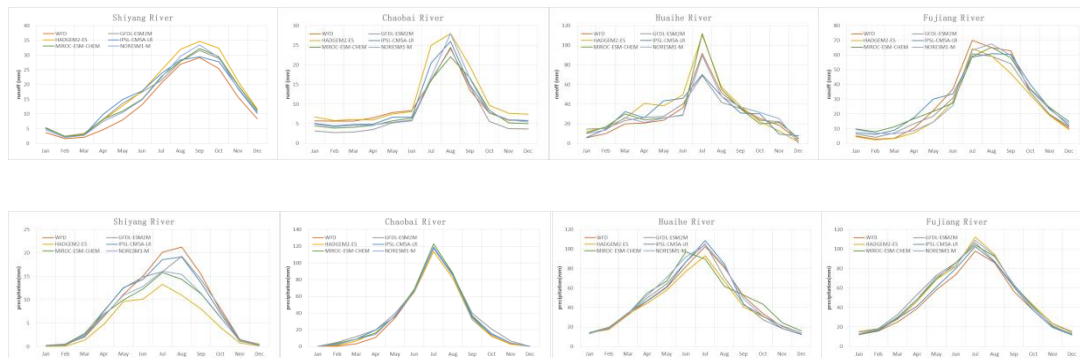

**Figure S3.** The agreements in simulated mean monthly runoff and mean monthly evapotranspiration based on WFD and downscaling climate data from 5 GCMs during 1961-2001 for the four river basins.

**Table S5.** The mean of middle-year of the 30-year samples for all GCMs under RCPs and under 1.5°C or 2°C global warming scenarios.

| threshold | RCP2.6 | RCP4.5 | RCP6.0 | RCP8.5 |
|-----------|--------|--------|--------|--------|
| 1.5°C     | 2029   | 2030   | 2032   | 2025   |
| 2.0°C     | ×      | 2049   | 2053   | 2038   |

**Table S3. Sensitivity results for pre-define parameters by SWAT for the four river basins**

| Rank | Shiyang River | Chaobai River | Huaihe River | Fujiang River |
|------|---------------|---------------|--------------|---------------|
| 1    | ALPHA_BF      | CN2           | CN2          | CN2           |
| 2    | GWQMN         | ALPHA_BF      | GWQMN        | ESCO          |
| 3    | TIMP          | GW_DELAY      | RCHRG_DP     | SOL_AWC       |
| 4    | CN2           | ESCO          | ESCO         | CANMX         |
| 5    | SMTMP         | GWQMN         | SOL_AWC      | GWQMN         |
| 6    | SOL_AWC       | CH_N          | GW_REVAP     | RCHRG_DP      |

**Table S4. Definition of identified sensitive parameters in SWAT hydrological model for the four river basins**

| Parameters | Definition                                                  | Processes   |
|------------|-------------------------------------------------------------|-------------|
| ALPHA_BF   | Baseflow recession constant (days)                          | Groundwater |
| CANMX      | Maximum canopy storage (mm H <sub>2</sub> O)                | Runoff      |
| CH_N       | Manning coefficient value                                   | Channel     |
| CN2        | SCS runoff curve number for moisture condition II           | Runoff      |
| ESCO       | Soil evaporation compensation factor                        | Evaporation |
| GW_DELAY   | Delay time for aquifer recharge (days)                      | Groundwater |
| GW_REVAP   | Groundwater “Revap” coefficient (days)                      | Groundwater |
| GWQMN      | Threshold water level in shallow aquifer for base flow (mm) | Soil        |
| RCHRG_DP   | Deep aquifer percolation coefficient (fraction)             | Groundwater |
| SMTMP      | Threshold temperature for snow melt ( °C)                   | Snow        |
| SOL_AWC    | Soil available water capacity (mm/mm soil)                  | Soil        |
| TIMP       | Snow temperature lag factor                                 | Snow        |
