# Supplementary material for: Assessment of climate change impact and difference on the riverrunoff in four basins in China under 1.5 °C and 2.0 °C globalwarming
Source: Copernicus journal article supplement (doi:10.5194/hess-2018-448), 2018-09-27
Supplement: Supplementary file [file hess-2018-448-AC2-supplement.pdf]

**Table S3. Sensitivity results for pre-define parameters by SWAT for the four river basins**

| Rank | Shiyang River | Chaobai River | Huaihe River | Fujiang River |
|------|---------------|---------------|--------------|---------------|
| 1    | ALPHA_BF      | CN2           | CN2          | CN2           |
| 2    | GWQMN         | ALPHA_BF      | GWQMN        | ESCO          |
| 3    | TIMP          | GW_DELAY      | RCHRG_DP     | SOL_AWC       |
| 4    | CN2           | ESCO          | ESCO         | CANMX         |
| 5    | SMTMP         | GWQMN         | SOL_AWC      | GWQMN         |
| 6    | SOL_AWC       | CH_N          | GW_REVAP     | RCHRG_DP      |

**Table S4. Definition of identified sensitive parameters in SWAT hydrological model for the four river basins**

| Parameters | Definition                                                  | Processes   |
|------------|-------------------------------------------------------------|-------------|
| ALPHA_BF   | Baseflow recession constant (days)                          | Groundwater |
| CANMX      | Maximum canopy storage (mm H <sub>2</sub> O)                | Runoff      |
| CH_N       | Manning coefficient value                                   | Channel     |
| CN2        | SCS runoff curve number for moisture condition II           | Runoff      |
| ESCO       | Soil evaporation compensation factor                        | Evaporation |
| GW_DELAY   | Delay time for aquifer recharge (days)                      | Groundwater |
| GW_REVAP   | Groundwater “Revap” coefficient (days)                      | Groundwater |
| GWQMN      | Threshold water level in shallow aquifer for base flow (mm) | Soil        |
| RCHRG_DP   | Deep aquifer percolation coefficient (fraction)             | Groundwater |
| SMTMP      | Threshold temperature for snow melt ( °C)                   | Snow        |
| SOL_AWC    | Soil available water capacity (mm/mm soil)                  | Soil        |
| TIMP       | Snow temperature lag factor                                 | Snow        |

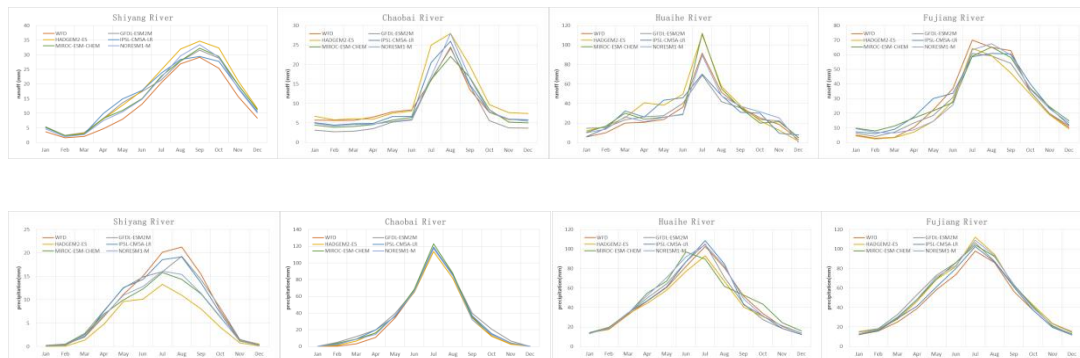

**Figure S3. The agreements in simulated mean monthly runoff and mean monthly evapotranspiration based on WFD and downscaling climate data from 5 GCMs during 1961-2001 for the four river basins.**

**Table S2. The agreements in annual mean, maximum and minimum temperature, and mean annual precipitation based on WFD and downscaling climate data from five GCMs for during 1961-2001 for the four river basins.**

| River | GFDL-ES<br>M2M | HadGEM2-<br>ES | IPSL-CM<br>5A-LR | MIROC-ES<br>M-CHEM | NorESM1-M |
|-------|----------------|----------------|------------------|--------------------|-----------|
|-------|----------------|----------------|------------------|--------------------|-----------|

|         | Difference in mean annual temperature (°C)         |       |       |       |       |
|---------|----------------------------------------------------|-------|-------|-------|-------|
| Shiyang | -0.01                                              | -0.03 | 0.02  | -0.00 | -0.03 |
| Chaobai | -0.01                                              | -0.02 | 0.08  | -0.03 | -0.01 |
| Huaihe  | -0.01                                              | 0.01  | 0.07  | -0.03 | -0.05 |
| Fujiang | 0.31                                               | 0.31  | 0.36  | 0.33  | 0.29  |
| River   | Difference in mean annual maximum temperature (°C) |       |       |       |       |
| Shiyang | 0.00                                               | 0.07  | 0.04  | 0.02  | 0.04  |
| Chaobai | 0.02                                               | 0.10  | -0.02 | 0.00  | 0.02  |
| Huaihe  | 0.07                                               | 0.13  | 0.03  | 0.01  | 0.06  |
| Fujiang | 0.24                                               | 0.29  | 0.25  | 0.23  | 0.27  |
| River   | Difference in mean annual minimum temperature (°C) |       |       |       |       |
| Shiyang | -0.01                                              | 0.03  | 0.01  | -0.01 | 0.01  |
| Chaobai | -0.03                                              | 0.08  | -0.02 | -0.01 | 0.00  |
| Huaihe  | 0.00                                               | 0.05  | -0.05 | -0.07 | -0.04 |
| Fujiang | 0.37                                               | 0.41  | 0.39  | 0.34  | 0.35  |
| River   | Difference in mean annual precipitation (%)        |       |       |       |       |
| Shiyang | 14.8                                               | 7.8   | 13.3  | 6.3   | 5.2   |
| Chaobai | 9.7                                                | 8.2   | 9.1   | 8.0   | 6.3   |
| Huaihe  | 4.9                                                | 5.4   | 5.3   | 3.9   | 4.8   |
| Fujiang | 11.0                                               | 5.6   | 8.7   | 10.4  | 7.2   |

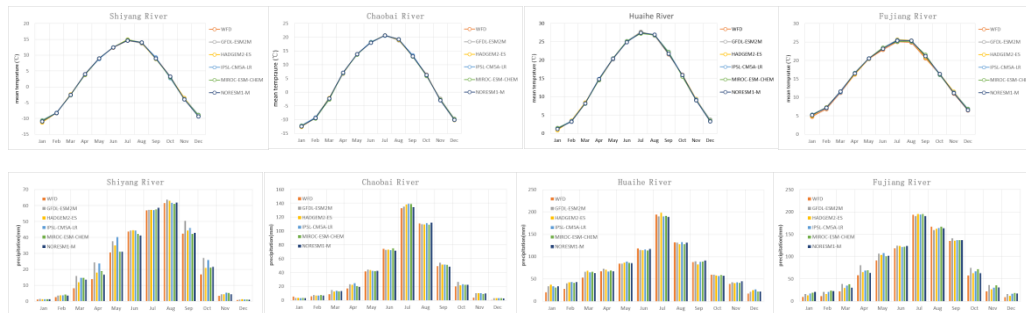

**Figure S2.** The agreements in monthly mean temperature and mean precipitation based on WFD and downscaling climate data from five GCMs for during 1961-2001 for the four river basins.

**Table S5.** The mean of middle-year of the 30-year samples for all GCMs under RCPs and under 1.5°C or 2°C global warming scenarios.

| threshold | RCP2.6 | RCP4.5 | RCP6.0 | RCP8.5 |
|-----------|--------|--------|--------|--------|
| 1.5°C     | 2029   | 2030   | 2032   | 2025   |
| 2.0°C     | ×      | 2049   | 2053   | 2038   |
