# Supplementary material for: Assessment of climate change impact and difference on the riverrunoff in four basins in China under 1.5 °C and 2.0 °C globalwarming
Source: Copernicus journal article supplement (doi:10.5194/hess-2018-448), 2018-09-27
Supplement: Supplementary file [file hess-2018-448-AC3-supplement.pdf]

# Assessment of climate change impact and difference on the river runoff in four basins in China under 1.5 °C and 2.0 °C global warming

Hongmei Xu<sup>1</sup>, Liliu Liu<sup>1</sup>, Yong Wang<sup>2</sup>, Sheng Wang<sup>3</sup>, Ying Hao<sup>4</sup>, Jingjin Ma<sup>5</sup>, Tong Jiang<sup>6,1</sup>

5 <sup>1</sup>National Climate Center, China Meteorological Administration, Beijing, 100081, China

<sup>2</sup>Chongqing Climate Center, Chongqing, 401147, China

<sup>3</sup>Anhui Climate Center, Hefei, 230031, China

<sup>4</sup>Anhui Meteorological Observatory, Hefei, 230031, China

<sup>5</sup>Beijing Meteorological Disaster Prevention Center, Beijing, 100089, China

10 <sup>6</sup>Collaborative Innovation Center on Forecast and Evaluation of Meteorological Disasters, School of Geography and Remote Sensing, Nanjing University of Information Science & Technology, Nanjing, 210044, China

*Correspondence to:* Hongmei Xu ([xuhm@cma.gov.cn](mailto:xuhm@cma.gov.cn))

*Co-correspondence to:* Tong Jiang ([jiangtong@cma.gov.cn](mailto:jiangtong@cma.gov.cn))

15 **Abstract:** To quantify climate change impact and difference on basin-scale river runoff under the limiting global warming thresholds of 1.5 °C and 2.0 °C, this study examined four river basins covering a wide hydroclimatic setting. We analyzed projected climate change in four basins, quantified climate change impact on annual and seasonal runoff based on the Soil Water Assessment Tool, and estimated the uncertainty constrained by the global circulation models (GCMs) structure and the Representative Concentration Pathways (RCPs). All statistics for the two basins located in northern China indicated  
20 generally warmer and wetter conditions, whereas the two basins located in southern China projected less warming and were inconsistent regarding annual precipitation change. The simulated changes in annual runoff were complex; however, there was no shift in seasonal runoff pattern. The 0.5 °C global warming difference caused 0.7 °C and 0.6 °C warming in basins in northern and southern China, respectively. This led to projected precipitation increase by about 2% for the four basins, and to  
25 a decrease in simulated annual runoff of 8% and 1% in the Shiyang and Huaihe rivers, respectively, but to an increase of 4% in the Chaobai and Fujiang rivers. The uncertainty in projected annual temperature was dominated by the GCMs or the RCPs; however, that of precipitation was constrained mainly by the GCM. The 0.5 °C difference decreased the uncertainty both in the annual precipitation projection and the annual and monthly runoff simulation.

Keywords: 1.5 °C and 2.0 °C warming; runoff; Shiyang River; Chaobai River; Huaihe River; Fujiang River

## 1 Introduction

In addition to changes in other variables of the climate system, global temperature has shown warming of 0.85 °C during 1880–2012 and further increase of 2.0–4.0 °C is projected over the next 100 years (IPCC, 2013). The observed changes in climate have affected both natural and human systems in recent decades. The level of climate change risk at 1.0 °C or 2.0 °C global warming is thought considerable, while that associated with an increase of  $\geq 4.0$  °C global warming is considered high to very high (IPCC, 2014). The target of 1.5 °C and 2.0 °C global warming relative to the preindustrial climate has been proposed as a threshold which the dangerous effects of anthropogenic climate change might be limited (UNFCCC, 2015). Significant progress has been achieved in comprehensive quantitative assessments of aggregate global climate impact (Schellnhuber et al., 2014). However, climate research is also challenged to provide more robust information on the impact of climate change under different scenarios of global warming (particularly at local and regional scales) to assist the development of sound scientific adaptation and mitigation measures (Huber et al., 2014). For example, a number of areas have been identified with severe projected impacts of warming at 2.0 °C (Schleussner et al., 2016).

Observed climate change has caused changes in global hydrological cycle, and this is expected to have considerable impact on multiple scale freshwater availability (Schmied et al., 2016). Most regional changes in precipitation can be attributed either to internal variability of the atmospheric circulation or to global warming. Climate change over the 21<sup>st</sup> century is projected to reduce renewable surface water significantly in most dry subtropical regions, while water resources are projected to increase at high latitudes (IPCC, 2014). At the global scale, the extreme rainfall is projected to more frequency under both 1.5 °C and 2.0 °C warming until around 2070; however, the increase is expected to be higher under 2 °C warming after the late 2030s (Zhang and Villarini, 2017). Furthermore, global warming of 2.0 °C is anticipated to affect natural runoff in river basins around the world and to dominate runoff changes, even considering human impact (Haddeland et al., 2014). Global warming of 2.0 °C will enhance water scarcity in areas projected to experience severe water resources reduction, although uncertainties exist in the projected changes in discharge and in the spatial heterogeneity depending on the contributions from global hydrological models and global climate models (Schewe et al., 2014). For the most region with simulated water resource declined, the uncertainties in simulated runoff usually constrained by global hydrological models, which suggests the necessity for improvement of regional- or local-scale hydrological projections (Su et al., 2017). Comparison of the performance of global and regional hydrological models indicates that regional hydrological models are better able to represent the long-term average seasonal dynamics (Hattermann et al., 2017; Gosling et al., 2017).

Within the context of the global temperature increase, China has experienced robust warming that is characterized by the greatest rate of annual mean temperature increase (i.e., more than 0.3 °C/10a during 1961–2012) in northern areas (Third National Assessment Report for Climate Change, 2015). River runoff has decreased consistently in the Yellow, Liao, and Songhua rivers but increased in the Pearl River because of increased precipitation in southern China and decreased precipitation in northern China combined with human activities (Xu et al., 2010). The runoff of rivers located in northern China, in areas with arid and semiarid climate, is more sensitive to precipitation than in southern China (Xie et al., 2018).

The 2.0 °C warming threshold will be exceeded under two Representative Concentration Pathways (RCPs), averaged across China, will be around 2033 ± 15a under RCP4.5 and 2029 ± 10a under RCP8.5 (Chen and Zhou, 2016). Simulations suggest that the Yiluo River in northern China will have reduced annual runoff but with a wetter flood season under both 1.5 °C and 2.0 °C warming, while the Beijiang River in southern China will have a slight increase in annual runoff with a drier flood season (Liu et al., 2017). The simulated runoff changes of the Yangtze River decrease under 1.5 °C warming; however, it shows opposite changes under 2.0 °C global warming (Chen et al., 2017).

The objectives involved in this paper address the following: (1) to detect the level of warming and the change in precipitation in four river basins with differing hydroclimatic characteristics under limiting global warming thresholds of 1.5 °C and 2.0 °C, (2) to simulate the changes in river runoff under 1.5 °C and 2.0 °C warming among the four basins, (3) to estimate the uncertainty constrained by global circulation models (GCMs) and RCPs, and (4) to quantify the difference in projected climate changes and simulated changes of river runoff in relation to 0.5 °C global warming difference among the four basins. To achieve these objectives, firstly, we analyze the projected changes in mean annual temperature and precipitation in the selected four basins at the annual scale under 1.5 °C and 2.0 °C warming. Secondly, we investigate the changes in annual and monthly river runoff in the four river basins based on validated Soil Water Assessment Tool (SWAT). Finally, we quantify the uncertainties in climate change impacts on river runoff based on five GCMs under four RCPs.

## 2 Study basins and available data

### 2.1 Basins

Four basins that span a wide hydroclimatic gradient from dry to wet were selected as case studies in this research. The locations as well as the physical and hydroclimatic characteristics of the selected basins are presented in Fig. 1 and Table 1. The Shiyang River basin is one of three inland river basins in Northwest China. The basin is dominated by a continental temperate arid climate and variable topography. The Shiyang River has eight tributaries that originate in the Qilian Mountains, the total drainage in mountain area of which ( $1.1 \times 10^4 \text{ km}^2$ ) was selected as the study area. River discharge is derived mainly from precipitation and snow melt water in summer and from groundwater in winter. Of the eight tributaries in the Shiyang River basin, five have decreasing trends in annual streamflow, mainly because of reduced precipitation (Ma et al., 2008). The basin has lost much of its natural vegetation and it has undergone gradual desertification due to limited water resources, inappropriate human activities, and the arid climate, which together pose considerable threat to sustainable agricultural development (Zhu and Li, 2014).

The Chaobai River basin is located on the North China Plain and it is a tributary of the Haihe River. The basin is dominated by a continental temperate monsoon climate. The Chaobai River originates from the Yanshan Mountain via two tributaries: the Chaohe and the Baihe rivers. The total area of the basin above the Xiahui and Zhangjiafen gauging stations (about  $1.4 \times 10^4 \text{ km}^2$ ) was selected as the study area. This watershed is the source of more than half the water supplied to Beijing. Its

runoff has declined considerably during 1956-2004 because of climate change, land use and land cover change, and increased water consumption (Xu et al., 2014; Yang and Tian, 2009).

The Huaihe River basin is an extensive flat plain located in a transition zone between the climates of North and South China. The basin is dominated by a warm temperate monsoon semihumid climate. The upper region of the Huaihe River basin above the Wujiadu gauging station, which has a drainage area of about  $12.1 \times 10^4 \text{ km}^2$ , was selected as the study area. Climate change has led to severe storms, reduced and intense droughts in Huaihe River Basin (Zhang et al., 2015).

The Fujiang River is the tributary of the Yangtze River and originates from Min Mountain located in Southwest China. The Fujiang River basin is dominated by a humid subtropical climate. The area above the Xiaoheba gauging station, which has a drainage area of  $2.9 \times 10^4 \text{ km}^2$ , was selected as the study area. Because of the high population density, intensive agricultural practices, and decreasing precipitation, the observed river discharge has a decreasing trend; however, high-intensity and long-duration precipitation in this area frequently results in floods and associated landslides (Gao et al., 2017).

## 2.2 Available data

The consistent spatial dataset, such as the digital elevation model of China generated from topographic map with 1:250,000 scale, the harmonized world soil database with 30 arcsecond resolution (FAO/IIASA/ISRIC/ISS-CAS/JRC, 2008), and the digital land use map of China with 1:500,000 were used for the parameterization of SWAT.

The observed discharge data were provided by the local authorities based on the Water Year Books. Monthly discharge records for selected gauging stations in the four basins (listed in Table 2) for the period of 1961–2001 were used for SWAT evaluation. The daily climate dataset (WATCH Forcing Data: WFD) (Weedon et al., 2010) with the resolution of 0.5 degree covered the period of 1958-2001 was obtained from the Water and Global Change Program. The WFD was used for driving SWAT hydrological model for the historical period, and also was used for the basis for GCMs output downscaling. Gridded reanalysis climate datasets have been used for hydrological modeling widely, and the WFD is considered an acceptable dataset for forcing hydrological models in comparison with gridded observation database (Essou et al., 2016). Furthermore, WFD has been widely used in climate change impact assessment at regional or catchment scale in China (Hao et al., 2018; Liu et al., 2017; Chen et al., 2017; Su et al., 2017). WFD appears to be appropriate for application to hydrological modeling in this study, and the comparison of mean annual and monthly temperature and precipitation based on WFD and meteorological observations showed in Table S1 and Figure S1.

GCMs outputs were derived from the Inter-Sectoral Impact Model Intercomparison Project for five GCMs (HadGEM2-ES, IPSL-CM5A-LR, MIROC-ESM-CHEM, GFDL-ESM2M and NorESM1-M) under four RCPs (RCP2.6, RCP4.5, RCP6.0 and RCP8.5) (Warszawski et al., 2014). These climate model outputs are spatially interpolated into  $0.5^\circ$  resolution and corrected using trend-preserving bias correction approach based on WFD for the period 1950–2005 for historical simulation and 2006-2099 for future projection under (Hempel et al., 2013). The downscaling climate data from GCMs showed very good coherence with WFD in 1961-2001 (Table S2 and Figure S2). These models were selected to span GMT change and relative precipitation change as effectively as possible (Warszawski et al. 2014). The FRC index (Fractional range coverage)

of the five GCMs in ISI-MIP project is 0.75 and 0.59, respectively, which is better than the five GCMs randomly selected from CMIP5, and can reasonably represent the changes of regional average temperature and precipitation (McSweeney and Jones, 2016). Such a subset can provide climate information that can improve the understanding of both the total uncertainty of future climate impacts and the uncertainty constrained by the use of different GCMs and RCPs.

## 5 3 Methodology

### 3.1 Application of SWAT

The SWAT is a process-based semidistributed hydrological model, which can simulate the river flow, water balance and nutrient transport at basin scale (Gassman et al., 2007). As an open and free tool, the SWAT is applied worldwide under various climatic conditions and hydrologic regime (Xu and Luo., 2015).

- 10 The simulations using the SWAT model were forced by WFD climate data, and they were spun-up for the period 1958–1960. The SWAT models were then calibrated for the 1961–1990 and validated for 1991–2001 using monthly river runoff data from the gauging stations of the four basins. Using sensitivity analysis procedures embed in SWAT resulted in the six most sensitive parameters (Table S3) in the hydrological model for each of the four rivers. There were two consistent sensitive parameters “CN2” and “GWQMN” among all four river basins which control the runoff process and soil water moving
- 15 process respectively. However, there was consistent sensitive parameter for the two river basins located in northern China and southern China respectively, such as in the two river basins located in northern China, the common sensitive parameter was “ALPHA\_BF” which reflect the groundwater flow response to changes in recharge. There were specific sensitive parameters for each river basin, such as the temperature related parameters for snow “SMTMP” and “TIMP” in the Shiyang River basin. The definition of parameters showed in Table S4. The SWAT hydrological model were calibrated based on
- 20 SWAT-CUP (SWAT Calibration and Uncertainty Programs) (Abbaspour., et al, 2007) to improve the fit between simulated and observed discharge. For the Shiyang River, the observed monthly streamflow at the Jiutiaoling gauging station for the Xiyinghe tributary was used for model calibration and validation, while the parameterization was used for the entire Shiyang River. For the Chaobai River, the observed monthly streamflow at the Xiahui gauging station for the Chaohe River and at the Zhangjiafen gauging station for the Baihe River were available for hydrological model calibration and validation separately.
- 25 The coefficient of determination ( $R^2$ ), Nash–Sutcliffe efficiency ( $E_{ns}$ ) were used to measures the goodness-of-fit, and percentage of bias ( $P_{bias}$ ) was used to assess systematic over- or under estimation and when the absolute value is applied it shows the magnitude (Green and van Griensven, 2008). In general, the model simulation is considered acceptable when the  $E_{ns}$  values are greater than 0.5, and the  $P_{bias}$  less than  $\pm 25\%$  (Moriassi et al., 2007).

- Model performance statistics over the calibration and validation periods were all found “satisfactory” for the four basins
- 30 (Table 2). The performance statistics  $E_{ns}$  and  $R^2$  were both  $> 0.8$  and considered highly acceptable for the two basins in

southern China (i.e., the Huaihe and Fujiang rivers) for both the calibration and the validation periods. The same performance statistics were considered reasonably acceptable for the two basins in northern China (i.e., the Shiyang and Chaobai rivers) with efficiencies in the range 0.58–0.82. Although, there was a few cases showed that SWAT could be used in snowmelt-dominated streamflow (Wang and Melesse, 2005; Tolston and Shoemaker, 2007; Grusson et al., 2015), a few previous researches have indicate that SWAT model did not adequately predict winter flows or snowmelt-dominated runoff in several watershed (Peterson and Hamlett, 1998; Srivastava et al., 2006; Chanasyk et al., 2003; Benaman et al., 2005), , which could be one reason that the low values of the Nash-Sutcliffe efficiency for the Shiyang and Chaobai rivers in the northern China with cold winter. The successful application of the SWAT in different climate regions is considered adequate verification of the suitability of the model for future climate change impact on runoff in the four selected basins.

### 10 3.2 Climate change projection and runoff simulation

The future scenarios for limiting global warming thresholds of 1.5 °C and 2.0 °C were derived based on 30-year running mean of global mean temperature (GMT) followed the methodology of Liu et al. (2017) for each one of the 20 combinations under four RCPs and five GCMs of the climate projection subset. Table S5 showed the averaged middle year of the 30-year samples for all GCMs under each RCPs of 1.5 °C and 2.0 °C global warming. There were 18 scenarios under the threshold of 1.5 °C above preindustrial levels and 16 scenarios under the threshold of 2.0 °C. These scenarios were used to quantify the difference in the changes of the projected annual temperature and precipitation in the four basins by comparing with the baseline period (1976-2005).

To indicate the overall magnitude and difference of the climate change projection under limiting global warming thresholds of 1.5 °C and 2.0 °C, the projected changes in mean annual temperature and annual precipitation were quantified by the value of ensemble mean under all climate scenarios (Ave.), and the projected changes in maximum and minimum annual temperature and annual precipitation (Max. and Min.) among all climate scenarios. The uncertainty caused by RCPs was estimating using standard deviation of the mean of all GCMs under 1.5°C and 2.0°C global warming respectively, and the uncertainty constrained by GCMs was estimated using standard deviations of all RCPs under the two threshold of global warming, whereas the all source of uncertainty of climate change scenarios was estimating using the standard deviation of all the 18 and 16 climate scenarios under 1.5°C and 2.0°C global warming.

The hydrological simulation adopted the climate projection subset for the downscaling climate data, and the future climate scenarios from five GCM and validated SWAT models s in the four basins, and projected the impact of climate change on river discharges. Generally, the hydrological simulations based on downscaling climate data from five GCMs for baseline period compared well with those based on WFD, and were acceptable subsequent hydrological projection (Table S6 and Figure S3).The changes in averages of the annual and monthly runoff were compared based on the simulated runoff under all climate scenarios and with the simulated runoff based on the baseline period (1976-2005) from the five GCMs rather than the actual observed discharge data or simulated discharge forcing by WFD.

The simulated changes in mean annual runoff were quantified by the value of ensemble mean annual runoff of all climate scenarios under 1.5°C and 2.0°C global warming, and mean annual runoff under RCP 2.6, RCP4.5, RCP6.0 and RCP8.5 respectively, and mean annual runoff under GCM GFDL-ESM2M, HaDGem2, IPSL\_CM5A-LR, MIROC-ESM-CHEM, and NorESM1-M respectively. The simulated changes in monthly runoff were analysis by the proportion of monthly runoff in annual runoff using the mean of baseline period for 5 GCMs, and mean, maximum and minimum of simulated monthly runoff under all combined climate scenarios of GCMS and RCPs for 1.5°C and 2.0°C global warming, respectively.

## 4 Results

### 4.1 Projected climate change

The statistics of the projected climate change for the four basins from the 16 scenarios under 1.5 °C warming and the 18 scenarios under 2.0 °C warming are shown in Table 3. The results show substantial warming for all four basins under two thresholds global warming. The projected changes in ensemble mean annual temperature show 1.5 °C increase under 1.5 °C global warming and 2.2 °C increase under 2.0 °C warming for the Shiyang and the Chaobai rivers. While, the projected changes in ensemble mean annual precipitation show 3% and 5% increase under 1.5 °C warming, and 5% and 8% increase under 2.0 °C warming for the Shiyang and the Chaobai rivers, respectively. The projected changes in ensemble mean annual temperature show 1.1 °C and 1.2 °C increase under 1.5 °C warming, and 1.8 °C increase under 2.0 °C warming for the Huaihe and the Fujiang rivers. The projected changes in ensemble mean annual precipitation are minor for the Huaihe and Fujiang rivers (i.e.,  $<\pm 3\%$ ). All statistics for the two basins in northern China indicate generally warmer and wetter conditions in future compared with the ‘present day.’ The two basins in southern China are projected to have less warming and no consistent change in the projected ensemble mean annual precipitation.

The greatest range in projected changes in annual mean temperature occurs in the Huaihe River, with the warming range of 0.3–1.6 °C under 1.5 °C warming and that of 0.7–2.3 °C under 2.0 °C warming among all projection scenarios. The projected range in annual temperature is also large for the Shiyang River, with change in the range of warming 0.9–2.4 °C under 1.5 °C warming and that of 1.7–2.9 °C under 2.0 °C warming, respectively. There is no consistency in the direction of range in projected annual precipitation change among the four basins, with increases ranged 10% to 20% and decreases ranged –6% to –11%. For the two river basins in southern China, the range in projected change in annual precipitation is less than for the two basins in northern China.

The uncertainty is substantial in annual precipitation projection compared with that associated with annual temperature projection, with considerable dispersion among the scenarios. Comparing the uncertainty under limiting global warming under thresholds of 1.5 °C and 2.0 °C, the former has larger uncertainties for the projected change in annual precipitation than that under the later; however, it is the opposite for the projected change in annual temperature.

There is generally larger uncertainty constrained by the GCMs (i.e., about 1–3 times) than associated with the RCPs for the projected annual precipitation for all four basins. However, the uncertainty in annual temperature projection associated with the RCPs is larger in the Shiyang River (about 2 times) and in the Huaihe River (about 1.5–3.0 times) than constrained with the GCMs. All these findings show the uncertainty in the projection of annual precipitation mainly constrained by GCM structure across the four basins, whereas the dominance of the uncertainty associated with either the GCMs or the RCPs in the projection of annual mean temperature is dependent on the basin.

#### 4.2 Simulated annual river runoff

Figure 2 shows the simulated ensemble mean annual river runoff based on all combined climate scenarios, and the average simulated annual river runoff of the four RCPs and the average of the five GCMs. The simulated ensemble mean annual runoff decreases for the Shiyang River by about 25% and 33% under 1.5 °C and 2.0 °C warming, respectively, and the simulated change for the Fujiang River shows a decrease of about 4% under 1.5 °C warming. The simulated ensemble mean annual river runoff shows an increase with magnitude of about 8% and 12% for the Chaobai River and about 8% and 7% for the Huaihe River under 1.5 °C and 2.0 °C warming, respectively.

The decrease in the simulated annual river runoff for the Shiyang River occurs across all the combined scenarios, ranging from 0% to –72% under 1.5 °C warming and from –11% to –63% under 2.0 °C warming. For the other three basins, the change in simulated annual river runoff ranges from an increase of 57% to a decrease of 34%. The smallest range occurs in the Fujiang River, with a change in simulated annual river runoff in the range 10% to –17% and 11% to –11% under 1.5 °C and 2.0 °C warming, respectively. The largest range occurs in the Huaihe River, with a change in simulated annual river runoff in the range 57% to –34% under 1.5 °C warming and 38% to –32% under 2.0 °C warming. The simulated change in annual river runoff in the Chaobai River is in the range 37% to –34% under 1.5 °C warming and 39% to –20% under 2 °C warming.

The simulated change in annual river runoff for the mean of the four RCPs and the five GCMs shows consistent decrease in the range –61% to –14% under 1.5 °C warming and –56 to –18% under 2.0 °C warming for the Shiyang River, with the largest decrease occurring under RCP2.6. The simulated annual river runoff under the mean of the four RCPs for the Chaobai River shows consistent increase in the range 3% to 13% under 1.5 °C warming and 6% to 19% under 2.0 °C warming. For the Huaihe River, the simulated annual river runoff under RCP2.6 shows reduction of –33% and –25% under 1.5 °C and 2.0 °C warming, respectively, whereas it increases under the other scenarios by 6% to 20% and 10% to 17%, respectively. For the Fujiang River, the simulated annual river runoff shows reduction for all RCPs under 1.5 °C warming, but an increase for RCP4.5 and RCP6.0 under 2.0 °C warming.

The simulated annual river runoff for the Chaobai River under HaDGem2 for the mean of the four RCPs shows decrease of about –9% and –2% under 1.5 °C and 2.0 °C warming, respectively, while that of the Huaihe River under NorESM shows decrease of about –12%. However, for the Fujiang River, most GCMs show reduction for the simulated annual river runoff



in the range of 0% to -14% under 1.5 °C warming and 0% to -5% under 2.0 °C warming, while any increase is no larger than 3%.

There is less uncertainty in the simulated annual river runoff among all the scenarios under 2.0 °C than that of 1.5 °C warming when quantified by standard derivation. The uncertainties associated with the RCPs are 1.3–2.6 times those constrained by the GCMs for the Shiyang and Fujiang rivers, while for the Chaobai River, the uncertainties constrained by the GCMs are 2–3 times those associated with the RCPs. For the Huaihe River, the uncertainties associated with the RCPs are largest under 1.5 °C warming, whereas those constrained with the GCMs are largest under 2.0 °C warming.

#### 4.3 Simulated seasonal river runoff

Figure 3 shows the change in the proportion (mean monthly percentage of annual runoff) of maximum, average, and minimum simulated river runoff based on all combined scenarios. For the Shiyang and Fujiang rivers, the proportion shows no substantial change (i.e., <1.0%). For the Chaobai River, a decrease occurs during May–July with magnitude of about 1.0% to 2.0%, and an increase occurs mainly in September and October with magnitude of <2.0% under 1.5 °C warming. Similarly, a decrease occurs during May–August with magnitude of 0.4% to 2.3% and an increase occurs in September with magnitude of about 2.0% under 2.0 °C warming. While, a decrease occurs mainly during June–August for the Huaihe River, with magnitude of about 1.0% to 3.5% and 1.2% to 3.4%, while an increase occurs in May with magnitude of about 2.0% and in September with magnitude of <5% under 1.5 °C and 2.0 °C warming, respectively.

For all months, there are generally larger ranges for the mean monthly percentage of annual runoff for 1.5 °C warming. These results indicate the uncertainties in simulated monthly runoff are larger under 1.5 °C warming than under 2.0 °C warming.

## 5 Discussion and conclusion

### 5.1 Discussion

Precipitation is the main input of surface water resources and evapotranspiration (ET) is the main output. Previous studies have explored the climatic impacts of ET and runoff in China. For example, Liu et al. (2012) analyzed the environmental stress on ET and runoff over eastern China for 1961–2005. They found ET increased in most river basins, while runoff increased in the Pearl River and the southeast river basins in southern China but it decreased in the basins of the Haihe and Huaihe rivers in northern China. It was determined that climate change was the dominant factor governing the long-term trend of ET and runoff in southern China. Ma et al. (2008) indicated that decreased precipitation and increased potential ET contribute most to the reduction of streamflow in northwest China. In this study, the simulated changes in annual river runoff showed opposing characteristics with decrease in the Shiyang River in northwest China and increase in the Chaobai River in north China, although the annual precipitation projection in the two river basins increased consistently. Figure 4 shows change in simulated ET in the four river basins based on the SWAT. The results indicate a general increase in simulated ET

in all four basins. However, the magnitude of the simulated change of ET varies across the basins, i.e., it is larger in the two basins in north China than in the two basins in south China. The simulated change of ET in the Shiyang River shows increase of 21% and 13%, while that of the Chaobai River shows increase of 4% and 6% under 1.5 °C and 2.0 °C warming, respectively, which implies the increase in simulated ET contributes most to the decrease in simulated annual runoff in the Shiyang River.

Chen et al. (2014) analyzed the effects of climate change on runoff in the Asian monsoon region. They indicated that different basins respond differently to the same climate change scenario. For example, they found that the change in runoff of the Haihe River basin is highly sensitive to precipitation and temperature. It was established that a considerable increase in precipitation (about 4%) would be required to keep runoff unchanged in this semihumid basin in Northeast China, while a smaller precipitation increase (about 2.8%) would be required to maintain runoff in wetter basins in South China. As mentioned in Section 2.1, the four river basins in this study are located in different climatic zones and they have different hydrological processes. For the Chaobai River in a semihumid climate area, an increase in precipitation of about 5% and 7% would cause an increase in runoff of about 8% and 12% under 1.5 °C and 2.0 °C warming. However, a smaller precipitation increasing ( $\pm 3\%$ ) would cause a change in runoff of about 7% and 8% in the Huaihe River and of about 0% and  $-4\%$  in the Fujiang River under 1.5 °C and 2.0 °C warming. While, an increase in precipitation of about 5% and 7% caused a decrease in runoff of about  $-33\%$  and  $-25\%$  in the Shiyang River. Li et al. (2016) indicated that frozen soil meltwater accounted for about 20% of river runoff during the flood season, while glacier meltwater contributed only about 3% in the Shiyang River. However, the glacier meltwater process was not considered in SWAT-based simulations in this study, which would have also contributed to the decrease in simulated annual runoff in the Shiyang River.

This study followed the top-down methodology that common used in IPCC AR4 and AR5 WGII report. Within the IPCC AR 4 and AR5 water sector, most hydrological projection studies use the precipitation and temperature downscaled from GCMs to driven hydrological models. This study adopted climate projection information derived from Inter-Sectorial Impact Model Intercomparison Project (ISIMIP). Climate outputs are spatially interpolated into  $0.5^\circ \times 0.5^\circ$  resolution and corrected using trend-preserving bias correction approach based on reanalysis dataset WFD. However, the complex terrain in different river basins makes it difficult for reanalysis data to reach satisfactory agreement with station based observation. Our study show both underestimation and overestimation in precipitation and temperature. This could induce the uncertainty in the river runoff simulation. However, previous research indicates that the gridded climate dataset can be used in hydrological modeling, and the performance of hydrological model will improve by model calibration and validation (Xu et al., 2011). Furthermore, the SWAT hydrological model calibrated and validated based on WFD, then drive by downscaling climate data from GCMs for baseline period and climate scenarios under 1.5°C and 2.0°C global warming. Although, the method used for estimated the projected changes in runoff could avoid systematic errors that the SWAT model would introduce in comparing the projection period with the baseline period. However, This could also induce the uncertainty in the river runoff simulation

## 5.2 Conclusion

The 2.0 °C warming scenario caused more substantial warming than the 1.5 °C warming scenario in all four studied basins. For the two basins located in northern China, the 0.5 °C global warming difference caused warming of 0.7 °C in the local ensemble mean temperature; however, in southern China, this difference caused warming of 0.6 °C. The 0.5 °C global warming difference will cause consistently wetter conditions, with projected precipitation amounts about 2% greater for the four basins, although the projected changes in annual precipitation are minor in southern China compared with the increases in northern China.

The 2.0 °C warming caused a decrease of 8% and 1% in the simulated ensemble mean annual runoff in the Shiyang and Huaihe rivers compared with 1.5 °C warming, while it caused 4% increasing in the Chaobai and Fujiang rivers. Climatic–hydrological interaction increases the complexity of changes in simulated annual runoff; however, the 0.5 °C global warming difference will cause a “wet-get-wetter” and “dry-get-drier” response in the two basins in northern China, and it will moderate the simulated annual runoff in the two basins in southern China. There is no shift in seasonal runoff pattern attributable to the effects of projected changes in climate under 1.5 °C and 2.0 °C warming; however, the monthly runoff percentage does change in the Chaobai and Huaihe rivers in some months.

The range of projected annual temperature is largest for the Huaihe River and the Shiyang River, with the uncertainties dominated mainly by the RCPs. Conversely, the ranges are smallest in the Chaobai River basin and the Fujiang River basin, with the uncertainties mainly constrained by the GCMs. Although, the range in the projected change in annual precipitation is smaller in the two basins in southern China than in the two basins in northern China, the GCMs constitute the major source of the uncertainties in the projection of annual precipitation for the four river basins. Even under the limiting global warming thresholds of 1.5 °C and 2.0 °C, the uncertainties in the projected annual temperature at local or regional scale are dominated by either the GCMs or the RCPs; however, the uncertainties in local and regional projected annual precipitation are mainly constrained by GCM structure. The 0.5 °C global warming difference will generally reduce the uncertainties in the projected change in annual precipitation.

There is less uncertainty in the simulated change in runoff among all scenarios under 2.0 °C warming compared with 1.5 °C warming. This is consistent with the uncertainty in the projected annual precipitation. However, the uncertainties, dominated by the GCMs for the Chaobai River and constrained by the RCPs for the Shiyang and Fujiang rivers, limit confidence in the projected annual runoff for the four studied river basins. Generally, there are less uncertainties in the simulated monthly runoff under the 2.0 °C warming.

**Acknowledgments:** We wish to thank the Inter-Sectoral Impact Model Intercomparison Project (ISIMIP), which make the data of the five GCMs available. This study was jointly supported by the National Key R&D Program of China (2016YFE0102400), research project of the Meteorological Public Welfare Industry in China (GYHY201406021), and climatic change project of the China Meteorological Administration (CCSF201810).

## References

- Benaman, J., C. A. Shoemaker, and D. A. Haith. Calibration and validation of Soil and Water Assessment Tool on an agricultural watershed in upstate New York. *J. Hydrol. Eng.* 10(5): 363–374, 2005.
- Chanasyk, D. S., E. Mapfumo, and W. Willms. Quantification and simulation of surface runoff from fescue grassland watersheds. *Agric. Water Mgmt.* 59(2): 137–153, 2003.
- Chen, J., Gao, C., Zeng, X., et al.: Assessing changes of river discharge under global warming of 1.5 °C and 2 °C in the upper reaches of the Yangtze River Basin: Approach by using multiple- GCMs and hydrological models, *Quat. Int.*, 453, 63-67, <https://doi.org/10.1016/j.quaint.2017.01.017>, 2017.
- Chen, J., Xia, J., Zhao, C., et al.: The mechanism and scenarios of how mean annual runoff varies with climate change in Asian monsoon areas, *J. Hydrol.*, 517, 595-606, <https://doi.org/10.1016/j.jhydrol.2014.05.075>, 2014.
- Chen, X. and Zhou, T.: Uncertainty in crossing time of 2 °C warming threshold over China, *Chin. Sci. Bull.*, 61, 451-1459, <https://doi.org/10.1007/s11434-016-1166-z>, 2016.
- Compiling Committee for “Third National Assessment Report for Climate Change”: Third National Assessment Report for Climate Change, Science Press, Beijing, 2015.
- Essou, G., Sabarly, F., Lucas, P., et al.: Can precipitation and temperature from meteorological reanalyses be used for hydrological modeling?, *J. Hydrometeorol.*, 17(7), 1929-1950, <https://doi.org/10.1175/JHM-D-15-0138.1>, 2016.
- FAO/IIASA/ISRIC/ISS-CAS/JRC.: Harmonized World Soil Database (version 1.0). FAO, Rome, Italy and IIASA, Laxenburg, Austria, 2008.
- Gao, Z., Long, D., Tang, G., et al.: Assessing the potential of satellite-based precipitation estimates for flood frequency analysis in ungauged or poorly gauged tributaries of China’s Yangtze River basin, *J. Hydrol.*, 550, 478-496, <https://doi.org/10.1016/j.jhydrol.2017.05.025>, 2017.
- Gassman, P.W., Reyes, M.R., Green, C.H., and Arnold, J.G.: The soil and water assessment tool: historical development, applications and future research directions, *T. ASABE.*, 50, 1211–1250, 2007.
- Gosling, S., et al.: A comparison of changes in river runoff from multiple global and catchment-scale hydrological models under global warming scenarios of 1 °C, 2 °C and 3 °C, *Clim. Change*, 141(3), 577-595, <https://doi.org/10.1007/s10584-016-1773-3>, 2017.
- Grunwald, S., and C. Qi. GIS-based water quality modelling in the Sandusky watershed, Ohio, USA. *J. American Water Resour. Assoc.* 42(4): 957–973, 2006.
- Haddeland, I., et al.: Global water resource affected by human interventions and climate change, *Proc. Natl. Acad. Sci. USA.*, 111(9), 3251-3256, <https://doi.org/10.1073/pnas.1222475110>, 2014.
- Y. Hao, J. Ma, J. Chen, D. Wang, Y. Wang\*, H. Xu. Assessment of Changes in Water Balance Components under 1.5 °C and 2.0 °C Global Warming in Transitional Climate Basin by Multi-RCPs and Multi-GCMs Approach. *Water*, 10.1863, <https://doi.org/10.3390/w10121863>, 2018.

- Hattermann, F., et al.: Cross-scale intercomparison of climate change impacts simulated by regional and global hydrological models in eleven large river basins, *Clim. Change*, 141(3), 561-576, <https://doi.org/10.1007/s10584-016-1829-4>, 2017.
- Hempel, S., Frieler, K., Warszawski, L., et al.: A trend-preserving bias correction-the ISIMIP approach, *Earth. Syst. Dynam.*, 4, 219–236, <https://doi.org/10.5194/esd-4-219-2013>, 2013.
- 5 Huber, V., et al.: Climate impact research: beyond patchwork, *Earth. Syst. Dynam.*, 5(1), 399-408, <https://doi.org/10.5194/esd-5-399-2014>, 2014.
- IPCC.: Climate change 2013: the physical science basis. Contribution of working group I to the fifth assessment report of the IPCC, Cambridge University Press, New York, 2013.
- IPCC.: Climate change 2014: impact, adaptation, and vulnerability. Part A: Global and sectoral aspects. Contribution of  
10 working group II to the fifth assessment report of the IPCC, Cambridge University Press, Cambridge, 2014.
- Li, Z., Qi, F., Wang, Q.J., et al.: Contribution from frozen soil meltwater to runoff in an in-land river basin under water scarcity by isotopic tracing in northwestern China, *Glob. Planet. Change.*, 136, 41-51, <http://dx.doi.org/10.1016/j.gloplacha.2015.12.002>, 2016.
- Liu, L., Xu, H., Wang, Y., and Jiang, T.: Impacts of 1.5 and 2 °C global warming on water availability and extreme  
15 hydrological events in Yiluo and Beijiang River catchments in China, *Clim. Change*, 145(10), 1-14, <https://doi.org/10.1007/s10584-017-2072-3>, 2017.
- Liu, M., Tian, H., Lu, C., et al.: Effects of multiple environment stresses on evapotranspiration and runoff over eastern China, *J. Hydrol.*, 426-427, 39-54, <https://doi.org/10.1016/j.jhydrol.2012.01.009>, 2012.
- Ma, Z., Kang, S., Zhang, L., et al.: Analysis of impacts of climate variability and human activity on streamflow for a river  
20 basin in arid region of northwest China, *J. Hydrol.*, 352, 239-249, <https://doi.org/10.1016/j.jhydrol.2007.12.022>, 2008.
- McSweeney, C.F. and Jones, R.G.: How representative is the spread of climate projections from the 5 CMIP5 GCMs used in ISI-MIP?, *Climate. Serv.*, 1, 24–29, <https://doi.org/10.1016/j.cliser.2016.02.001>, 2016.
- Moriasi, D.N., et al.: Model evaluation guidelines for systematic quantification of accuracy in watershed simulations, *Trans. Asabe.*, 50(3), 885–900, 2007.
- 25 Peterson, J. R., and J. M. Hamlet. Hydrologic calibration of the SWAT model in a watershed containing fragipan soils. *J. American Water Resour. Assoc.* 34(3): 531-544, 1998.
- Schellnhuber, H.J., Frieler, K., Kabat, P.: The elephant, the blind, and the intersectoral intercomparison of climate impacts, *Proc. Natl. Acad. Sci. USA.*, 111(9), 3225-3227, <https://doi.org/10.1073/pnas.1321791111>, 2014.
- Schewe, J., et al.: Multimodel assessment of water scarcity under climate change. *Proc. Natl. Acad. Sci. USA.*, 111(9), 3245-  
30 3250, <https://doi.org/10.1073/pnas.1222460110>, 2014.
- Schleussner, C.F., et al.: Differential climate impacts for policy-relevant limits to global warming: the case of 1.5 °C and 2 °C, *Earth. Syst. Dynam.*, 6(2), 2447-2505, <https://doi.org/10.5194/esd-7-327-2016>, 2016.

- Schmied, H. M., et al.: Variations of global and continental water balance components as impacted by climate forcing uncertainty and human water use, *Hydrol. Earth Syst. Sci.*, 20, 2877-2898, <https://doi.org/10.5194/hess-20-2877-2016>, 2016.
- Srivastava, P., J. N. McNair, and T. E. Johnson. Comparison of process-based and artificial neural network approaches for streamflow modeling in an agricultural watershed. *J. American Water Resour. Assoc.* 42(2): 545–563, 2006.
- Su, B., Huang, J., Zeng, X., Gao, C., and Jiang, T.: Impacts of climate change on streamflow in the upper Yangtze River basin, *Clim. Change*, 141 (3), 533-546, <https://doi.org/10.1007/s10584-016-1852-5>, 2017.
- Tolson, B. A., and C. A. Shoemaker. Cannonsville reservoir watershed SWAT2000 model development, calibration, and validation. *J. Hydrol.* 337(1-2): 68–86, 2007.
- 10 UNFCCC.: Decision 1/CP.21, The Paris Agreement, 2015.
- Wang, X., and A. M. Melesse. Evaluation of the SWAT model's snowmelt hydrology in a northwestern Minnesota watershed. *Trans. ASABE* 48(4): 1359-1376, 2005.
- Warszawski, L., Frieler, K., Huber, V., et al.: The Inter-Sectoral Impact Model Intercomparison project (ISI-MIP): project framework, *Proc. Natl. Acad. Sci. USA.*, 111(9), 3228–3232, <https://doi.org/10.1073/pnas.1312330110>, 2014.
- 15 Weedon, G.P., Gomes, S., Viterbo, P., et al.: The WATCH forcing data 1958-2001: a meteorological forcing dataset for land surface- and hydrological, WATCH Technical Report No. 22 pp1-41, Available at <http://www.eu-watch.org>, 2010.
- Xie, P., et al.: Evaluation of the significance of abrupt changes in precipitation and runoff process in China, *J. Hydrol.*, 560, 451-460, <https://doi.org/10.1016/j.jhydrol.2018.02.036>, 2018.
- Xu, H. and Luo, Y.: Climate change and its impacts on river discharge in two climate regions in China, *Hydrol. Earth Syst. Sci.*, 19, 4609-4618, <https://doi.org/10.5194/hess-19-4609-2015>, 2015.
- 20 Xu, K., Milliman, J.D., Xu, H.: Temporal trend of precipitation and runoff in major Chinese Rivers since 1951, *Glob. Planet. Change.*, 73 (3-4), 219–232, <https://doi.org/10.1016/j.gloplacha.2010.07.002>, 2010.
- Xu, X., Yang, D., Yang, H., et al.: Attribution analysis based on the Budyko hypothesis for detecting the dominant cause of runoff decline in Haihe basin, *J. Hydrol.*, 510,530-540, <https://doi.org/10.1016/j.jhydrol.2013.12.052>, 2014.
- 25 Yang, Y. and Tian, F.: Abrupt change of runoff and its major driving factors in Haihe River Catchment, China, *J. Hydrol.*, 374 (3-4), 373-383, <https://doi.org/10.1016/j.jhydrol.2009.06.040>, 2009.
- Zhang, W., Pan, S., Cao, L., et al.: Changes in extreme climate events in eastern China during 1960-2013: A case study of the Huaihe River Basin, *Quat. Int.*, 380-381, 22-34, <https://doi.org/10.1016/j.quaint.2014.12.038>, 2015.
- Zhang, W. and Villarini, G.: Heavy precipitation is highly sensitive to the magnitude of future warming, *Clim. Change*, 45(1-2), 249-257, <https://doi.org/10.1007/s10584-017-2079-9>, 2017.
- 30 Zhu, Q. and Li, Y.: Environmental Restoration in the Shiyang River Basin, China: Conservation, reallocation and more efficient use of water, *Quati. Procedia.*, 24-34, <https://doi.org/10.1016/j.aqpro.2014.07.005>, 2014.

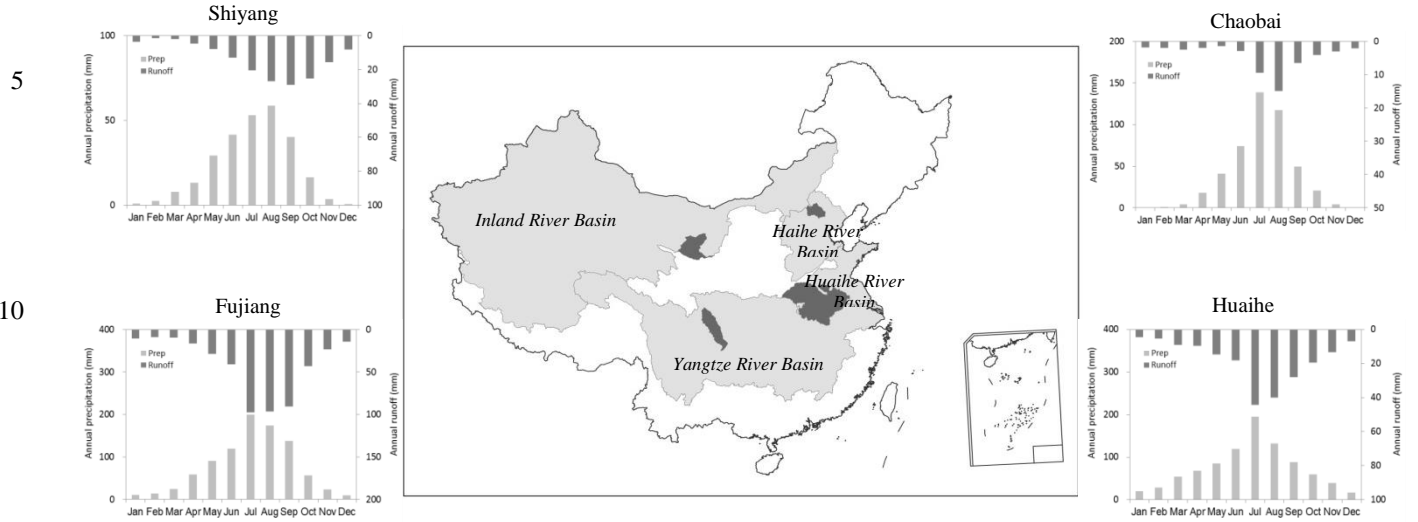

15 **Figure 1. Locations and average monthly precipitation/runoff of the four selected basins in China.**

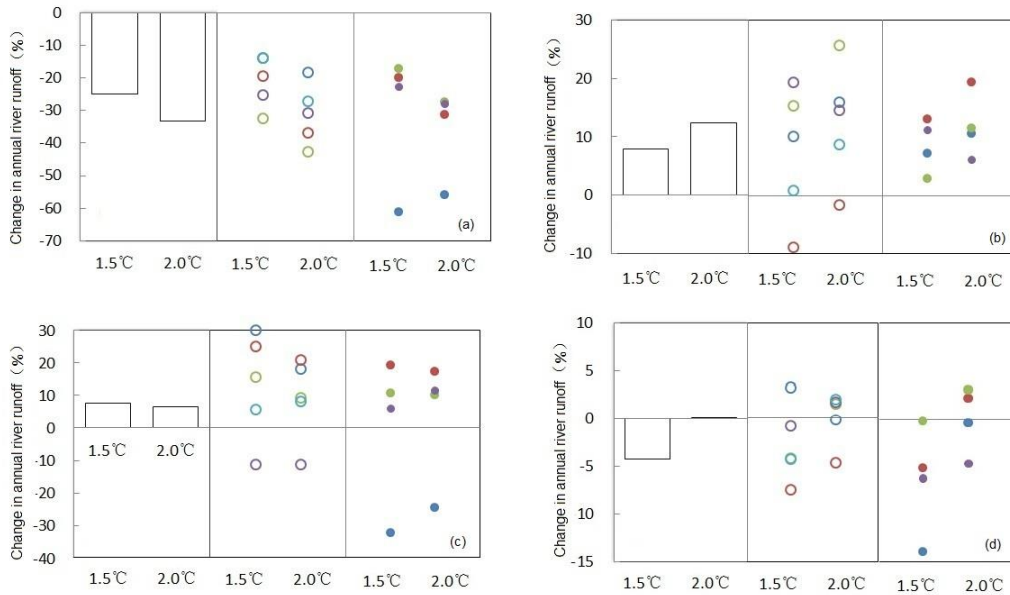

20 **Figure 2. Changes in simulated annual river runoff: (a) Shiyang River, (b) Chaobai River, (c) Huaihe River, and (d) Fujiang River under 1.5 °C and 2 °C global warming. (Baseline: 1976–2005; columns represent the simulated river runoff for all combined scenarios of GCMs and RCPs ; hollow circles colored dark blue, red, green, blue, and purple represent the GCMs: GFDL-ESM2M, HaDGem2, IPSL\_CM5A-LR, MIROC-ESM-CHEM, and NorESM1-M, respectively; solid circles colored dark blue, red, green, and purple represent the RCPs: RCP2.6, RCP4.5, RCP6.0, and RCP8.5, respectively).**

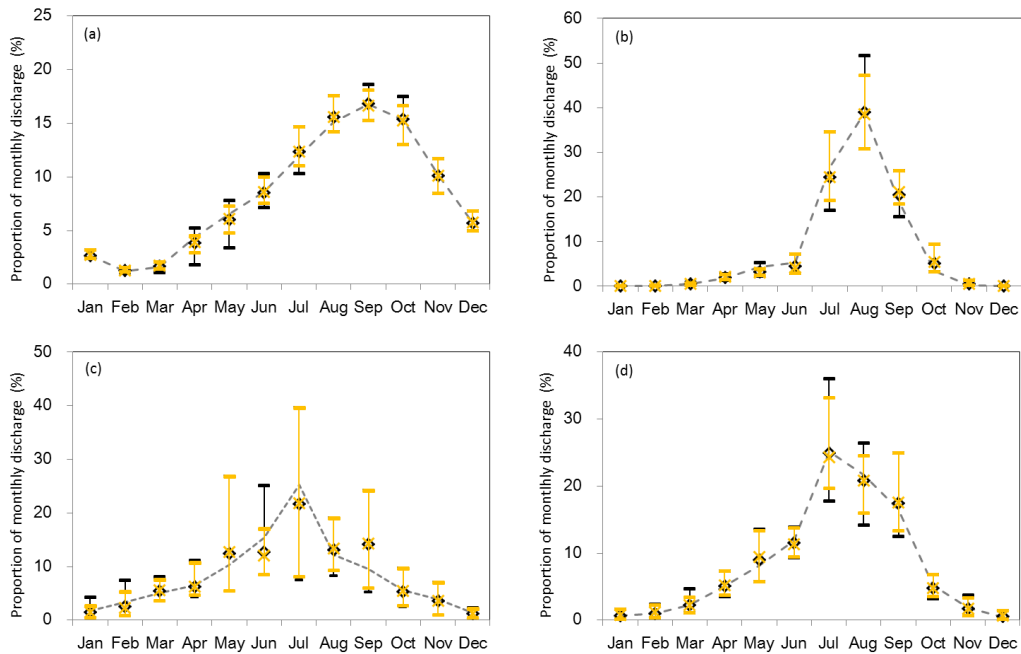

5 **Figure 3. Simulated proportion of monthly river runoff in annual runoff: (a) Shiyang River, (b) Chaobai River, (c) Huaihe River, and (d) Fujiang River under 1.5 and 2.0 °C global warming. (Baseline: 1976–2005; dotted line: mean of baseline for 5 GCMs, bars colored black and yellow show the maximum and minimum values of all simulated monthly runoff for all combined climate change scenarios of GCMs and RCPs; black diamonds and yellow crosses represent the mean values for monthly runoff for all combined climate change scenarios of GCMs and RCPs) .**

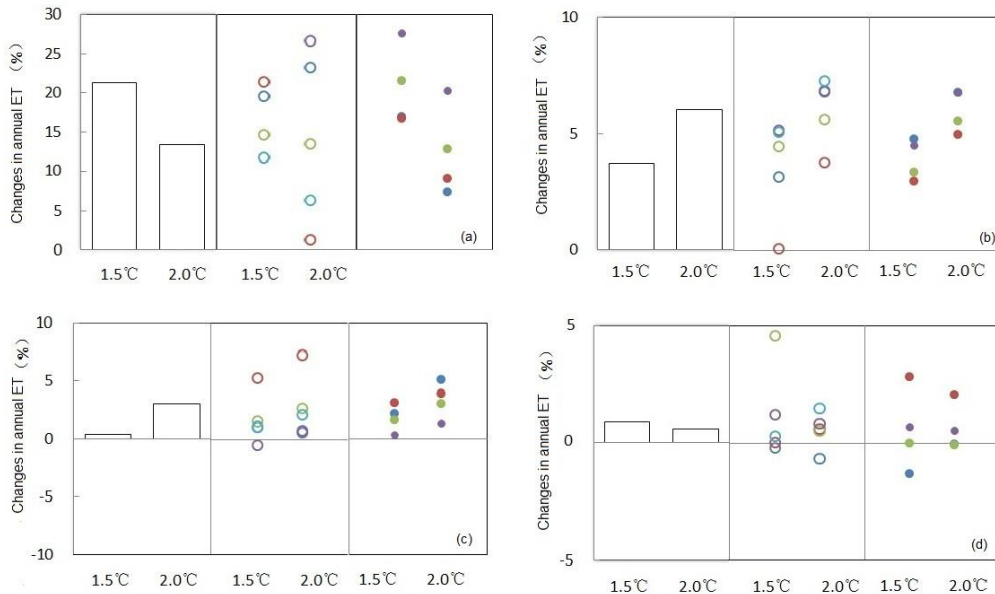

**Figure 4. Same as in Figure 2 but for change in simulated annual ET.**



**Table 1. Hydroclimatic characteristics of the four selected basins.**

| Basin         | Total Area<br>(Km <sup>2</sup> ) | Study Area<br>(Km <sup>2</sup> ) | Altitude(m) |      |      | 1961-2000 Average(mm) |        |
|---------------|----------------------------------|----------------------------------|-------------|------|------|-----------------------|--------|
|               |                                  |                                  | Max         | Mean | Min  | Precipitation         | Runoff |
| Shiyang River | 41,600                           | 11,000                           | 5090        | 2448 | 1398 | 498                   | 180    |
| Chaobai River | 19,354                           | 13,846                           | 2266        | 930  | 38   | 469                   | 53     |
| Huaihe River  | 144,900                          | 121,330                          | 2099        | 106  | 11   | 910                   | 203    |
| Fujiang River | 36,400                           | 29,488                           | 5541        | 1027 | 242  | 964                   | 481    |

**Table 2. Goodness of fit of SWAT simulations for monthly runoff of the Shiyang, Chaobai, Huaihe, and Fujiang rivers.**

| Basin         | River    | Gauging      | Area<br>(km <sup>2</sup> ) | Calibration (1961-1990) |                        |                          | Validation (1991-2001) |                        |                          |
|---------------|----------|--------------|----------------------------|-------------------------|------------------------|--------------------------|------------------------|------------------------|--------------------------|
|               |          |              |                            | <i>R</i> <sup>2</sup>   | <i>E</i> <sub>ns</sub> | <i>P</i> <sub>bias</sub> | <i>R</i> <sup>2</sup>  | <i>E</i> <sub>ns</sub> | <i>P</i> <sub>bias</sub> |
| Shiyang River | Xiyinghe | Jiutiaoling  | 1077                       | 0.65                    | 0.82                   | 1%                       | 0.71                   | 0.58                   | 7%                       |
| Chaobai River | Chaohe   | Xiahui       | 5340                       | 0.63                    | 0.63                   | 1%                       | 0.68                   | 0.65                   | 8%                       |
|               | Baihe    | Zhangjiafeng | 8506                       | 0.60                    | 0.56                   | 25%                      | 0.77                   | 0.61                   | -2%                      |
| Huaihe River  | Huaihe   | Wujiadu      | 121,330                    | 0.88                    | 0.87                   | 16%                      | 0.86                   | 0.81                   | 8%                       |
| Fujiang River | Fujiang  | Xiaoheba     | 29,488                     | 0.94                    | 0.87                   | 1%                       | 0.93                   | 0.87                   | 5%                       |

5 **Table 3. Projected changes in annual mean temperature and annual precipitation for the four basins under 1.5 °C and 2.0 °C global warming.**

| Basin         | Global warming | Annual mean temperature |      |      |             |      |      | Annual precipitation |      |      |             |      |      |
|---------------|----------------|-------------------------|------|------|-------------|------|------|----------------------|------|------|-------------|------|------|
|               |                | Changes (°C)            |      |      | Uncertainty |      |      | Changes (%)          |      |      | Uncertainty |      |      |
|               |                | Ave.                    | Max. | Min. | All         | GCMs | RCPs | Ave.                 | Max. | Min. | All         | GCMs | RCPs |
| Shiyang River | 1.5°C          | <b>1.5</b>              | 2.4  | 0.9  | 0.36        | 0.16 | 0.38 | <b>3</b>             | 18   | -11  | 7.0         | 6.6  | 5.0  |
|               | 2.0°C          | <b>2.2</b>              | 2.9  | 1.7  | 0.32        | 0.13 | 0.29 | <b>5</b>             | 15   | -6   | 6.0         | 4.7  | 2.1  |
| Chaobai River | 1.5°C          | <b>1.5</b>              | 1.8  | 1.1  | 0.22        | 0.20 | 0.02 | <b>5</b>             | 17   | -11  | 7.3         | 6.0  | 2.2  |
|               | 2.0°C          | <b>2.2</b>              | 2.8  | 1.7  | 0.33        | 0.15 | 0.06 | <b>7</b>             | 20   | -8   | 6.3         | 3.6  | 2.0  |
| Huaihe River  | 1.5°C          | <b>1.1</b>              | 1.6  | 0.3  | 0.35        | 0.21 | 0.30 | <b>0</b>             | 13   | -9   | 6.3         | 4.4  | 4.3  |
|               | 2.0°C          | <b>1.8</b>              | 2.3  | 0.7  | 0.38        | 0.12 | 0.35 | <b>3</b>             | 13   | -9   | 6.3         | 3.7  | 3.7  |
| Fujiang River | 1.5°C          | <b>1.2</b>              | 1.7  | 0.8  | 0.23        | 0.24 | 0.06 | <b>-2</b>            | 12   | -10  | 5.6         | 5.0  | 3.8  |
|               | 2.0°C          | <b>1.8</b>              | 2.2  | 1.3  | 0.28        | 0.17 | 0.10 | <b>0</b>             | 10   | -6   | 4.6         | 4.1  | 2.1  |

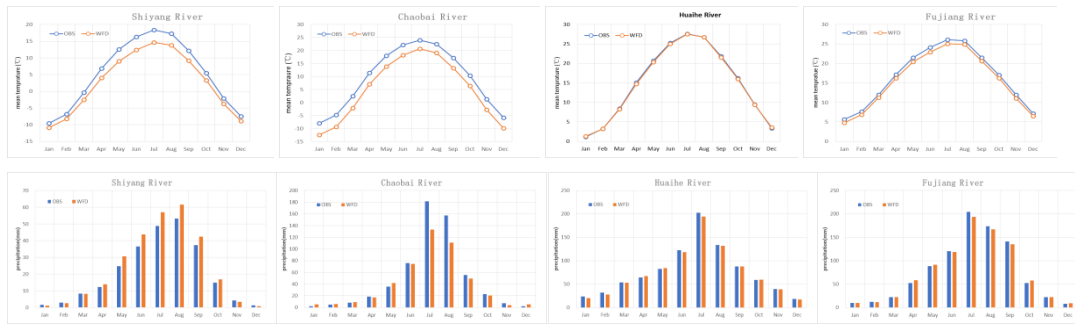

Figure S1. The differences in monthly mean temperature and monthly precipitation based on WFD and meteorological observations during 1961-2001.

5

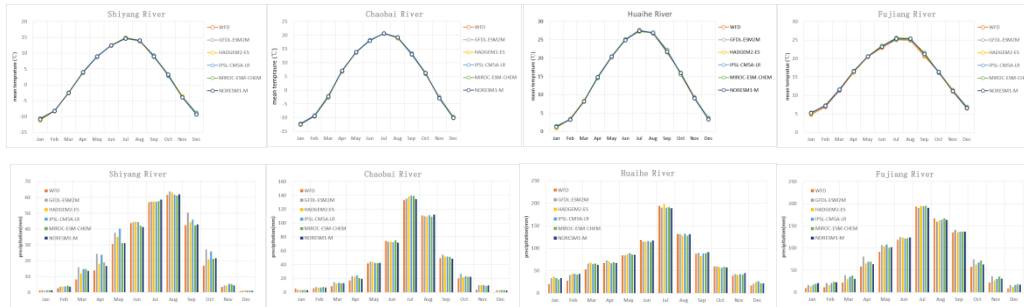

Figure S2. The agreements in monthly mean temperature and mean precipitation based on WFD and downscaling climate data from five GCMs for during 1961-2001 for the four river basins.

10

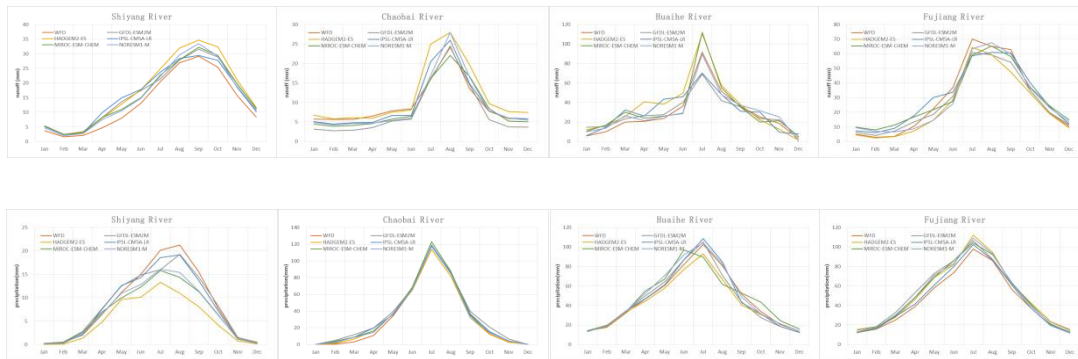

Figure S3. The agreements in simulated mean monthly runoff and mean monthly evapotranspiration based on WFD and downscaling climate data from 5 GCMs during 1961-2001 for the four river basins.

**Table S1. The differences in annual mean temperature and precipitation based on WFD and meteorological observations during 1961-2001.**

| River   | Annual precipitation |          |                | Annual mean temperature |         |                 |
|---------|----------------------|----------|----------------|-------------------------|---------|-----------------|
|         | OBS(mm)              | WFD (mm) | Difference (%) | OBS(°C)                 | WFD(°C) | Difference (°C) |
| Shiyang | 246.1                | 282.1    | 14.6           | 5.2                     | 2.7     | -2.5            |
| Chaobai | 570.7                | 476.5    | -20.0          | 9.2                     | 5.1     | -4.1            |
| Huaihe  | 917.6                | 898.7    | -2.1           | 14.9                    | 14.8    | -0.1            |
| Fujiang | 906.0                | 894.6    | -1.3           | 16.5                    | 15.6    | -0.9            |

**Table S2. The agreements in annual mean, maximum and minimum temperature, and mean annual precipitation based on WFD**

5 **and downscaling climate data from five GCMs for during 1961-2001 for the four river basins.**

| River   | GFDL-ESM2M                                         | HadGEM2-ES | IPSL-CM5A-LR | MIROC-ESM-CHEM | NorESM1-M |
|---------|----------------------------------------------------|------------|--------------|----------------|-----------|
|         | Difference in mean annual temperature (°C)         |            |              |                |           |
| Shiyang | -0.01                                              | -0.03      | 0.02         | -0.00          | -0.03     |
| Chaobai | -0.01                                              | -0.02      | 0.08         | -0.03          | -0.01     |
| Huaihe  | -0.01                                              | 0.01       | 0.07         | -0.03          | -0.05     |
| Fujiang | 0.31                                               | 0.31       | 0.36         | 0.33           | 0.29      |
| River   | Difference in mean annual maximum temperature (°C) |            |              |                |           |
| Shiyang | 0.00                                               | 0.07       | 0.04         | 0.02           | 0.04      |
| Chaobai | 0.02                                               | 0.10       | -0.02        | 0.00           | 0.02      |
| Huaihe  | 0.07                                               | 0.13       | 0.03         | 0.01           | 0.06      |
| Fujiang | 0.24                                               | 0.29       | 0.25         | 0.23           | 0.27      |
|         | Difference in mean annual minimum temperature (°C) |            |              |                |           |
| Shiyang | -0.01                                              | 0.03       | 0.01         | -0.01          | 0.01      |
| Chaobai | -0.03                                              | 0.08       | -0.02        | -0.01          | 0.00      |
| Huaihe  | 0.00                                               | 0.05       | -0.05        | -0.07          | -0.04     |
| Fujiang | 0.37                                               | 0.41       | 0.39         | 0.34           | 0.35      |
| River   | Difference in mean annual precipitation (%)        |            |              |                |           |
| Shiyang | 14.8                                               | 7.8        | 13.3         | 6.3            | 5.2       |
| Chaobai | 9.7                                                | 8.2        | 9.1          | 8.0            | 6.3       |
| Huaihe  | 4.9                                                | 5.4        | 5.3          | 3.9            | 4.8       |
| Fujiang | 11.0                                               | 5.6        | 8.7          | 10.4           | 7.2       |

**Table S3. Sensitivity results for pre-define parameters by SWAT for the four river basins**

| Rank | Shiyang River | Chaobai River | Huaihe River | Fujiang River |
|------|---------------|---------------|--------------|---------------|
| 1    | ALPHA_BF      | CN2           | CN2          | CN2           |
| 2    | GWQMN         | ALPHA_BF      | GWQMN        | ESCO          |
| 3    | TIMP          | GW_DELAY      | RCHRG_DP     | SOL_AWC       |
| 4    | CN2           | ESCO          | ESCO         | CANMX         |
| 5    | SMTMP         | GWQMN         | SOL_AWC      | GWQMN         |
| 6    | SOL_AWC       | CH_N          | GW_REVAP     | RCHRG_DP      |

**Table S4. Definition of identified sensitive parameters in SWAT hydrological model for the four river basins**

| Parameters | Definition                                                  | Processes   |
|------------|-------------------------------------------------------------|-------------|
| ALPHA_BF   | Baseflow recession constant (days)                          | Groundwater |
| CANMX      | Maximum canopy storage (mm H <sub>2</sub> O)                | Runoff      |
| CH_N       | Manning coefficient value                                   | Channel     |
| CN2        | SCS runoff curve number for moisture condition II           | Runoff      |
| ESCO       | Soil evaporation compensation factor                        | Evaporation |
| GW_DELAY   | Delay time for aquifer recharge (days)                      | Groundwater |
| GW_REVAP   | Groundwater “Revap” coefficient (days)                      | Groundwater |
| GWQMN      | Threshold water level in shallow aquifer for base flow (mm) | Soil        |
| RCHRG_DP   | Deep aquifer percolation coefficient (fraction)             | Groundwater |
| SMTMP      | Threshold temperature for snow melt (°C)                    | Snow        |
| SOL_AWC    | Soil available water capacity (mm/mm soil)                  | Soil        |
| TIMP       | Snow temperature lag factor                                 | Snow        |

**Table S5. The mean of middle-year of the 30-year samples for all GCMs under RCPs and under 1.5°C or 2°C global warming scenarios.**

| threshold | RCP2.6 | RCP4.5 | RCP6.0 | RCP8.5 |
|-----------|--------|--------|--------|--------|
| 1.5°C     | 2029   | 2030   | 2032   | 2025   |
| 2.0°C     | ×      | 2049   | 2053   | 2038   |

5

**Table S6. The agreements in mean annual runoff and evapotranspiration based on WFD and downscaling climate simulation from 5 GCMs for during 1961-2001 for the four river basins.**

| River | GFDL-ESM2M | HadGEM2-ES | IPSL-CM5A-LR | MIROC-ESM-CHEM | NorESM1-M |
|-------|------------|------------|--------------|----------------|-----------|
|       |            |            |              |                |           |

|         | Difference in mean annual runoff (%)             |       |      |       |       |
|---------|--------------------------------------------------|-------|------|-------|-------|
| Shiyang | 16.2                                             | 25.3  | 16.6 | 14.4  | 12.7  |
| Chaobai | -19.3                                            | 21.5  | 0.5  | -9.1  | -2.3  |
| Huaihe  | -7.2                                             | 23.7  | 9.3  | 6.3   | 3.8   |
| Fujiang | -6.2                                             | -16.7 | 6.3  | 0.0   | -4.3  |
| River   | Difference in mean annual evapotranspiration (%) |       |      |       |       |
| Shiyang | -3.3                                             | -37.7 | -4.7 | -19.8 | -17.6 |
| Chaobai | 12.4                                             | -0.5  | 6.6  | 7.5   | 3.2   |
| Huaihe  | -1.8                                             | -8.1  | 0.8  | 3.2   | 4.8   |
| Fujiang | 15.5                                             | 13.4  | 4.7  | 11.7  | 12.7  |
